# Supplementary material for: The E2F4 prognostic signature predicts pathological response to neoadjuvant chemotherapy in breast cancer patients
Source: PubMed Central journal article supplement (PMC5414335; doi:10.1186/s12885-017-3297-2), 2017-05-02
Supplement: 12885_2017_3297_MOESM1_ESM.pdf [file 12885_2017_3297_MOESM1_ESM.pdf]

### Additional File 1: Clinical characteristics by dataset of samples used in analysis

| Stratum              |               | Datasets N(%)                                                                                               |                   |                                                                                         |              |                                                |                                            | Tabchy     |
|----------------------|---------------|-------------------------------------------------------------------------------------------------------------|-------------------|-----------------------------------------------------------------------------------------|--------------|------------------------------------------------|--------------------------------------------|------------|
|                      |               | Hatzis Discovery                                                                                            | Hatzis Validation | Hatzis Complete                                                                         | Horak        | Iwamoto<br>(MDACC/IGR)                         | Iwamoto<br>(USO-02103)                     |            |
|                      |               | GSE25055                                                                                                    | GSE25065          | GSE25066                                                                                | GSE41998     | GSE22093                                       | GSE23988                                   |            |
| Total                |               | 310                                                                                                         | 198               | 508                                                                                     | 279          | 103                                            | 61                                         | 178        |
| Age in years         | ≤ 50          | 168 (54)                                                                                                    | 89 (45)           | 257 (51)                                                                                | 113 (41)     | 43 (44)                                        | 26 (43)                                    | 78 (44)    |
|                      | > 50          | 142 (46)                                                                                                    | 109 (55)          | 251 (49)                                                                                | 166 (59)     | 54 (56)                                        | 35 (57)                                    | 100 (56)   |
|                      | Mean (SD)     | 50 (10)                                                                                                     | 49 (11)           | 50 (10)                                                                                 | 49 (11)      | 49 (11)                                        | 49 (9)                                     | 51 (11)    |
| ER Status            | ER positive   | 174 (56)                                                                                                    | 123 (62)          | 297 (58)                                                                                | 171 (61)     | 56 (54)                                        | 29 (48)                                    | 80 (45)    |
|                      | ER negative   | 131 (42)                                                                                                    | 74 (37)           | 205 (40)                                                                                | 108 (39)     | 42 (41)                                        | 32 (52)                                    | 98 (55)    |
|                      | Indeterminate | 5 (2)                                                                                                       | 1 (1)             | 6 (1)                                                                                   | 0 (0)        | 5 (5)                                          | 0 (0)                                      | 0 (0)      |
| Neoadjuvant Response | pCR           | 57 (18)                                                                                                     | 42 (21)           | 99 (19)                                                                                 | 40 (14)      | 28 (27)                                        | 20 (33)                                    | 26 (15)    |
|                      | RD            | 249 (80)                                                                                                    | 140 (71)          | 389 (77)                                                                                | 230 (82)     | 69 (67)                                        | 41 (67)                                    | 152 (85)   |
|                      | Unknown       | 4 (1)                                                                                                       | 16 (8)            | 20 (4)                                                                                  | 9 (3)        | 6 (6)                                          | 0 (0)                                      | 0 (0)      |
| Microarray Platform  |               | Affymetrix                                                                                                  | Affymetrix        | Affymetrix                                                                              | Affymetrix   | Affymetrix                                     | Affymetrix                                 | Affymetrix |
|                      |               | HG-U133A                                                                                                    | HG-U133A          | HG-U133A                                                                                | HG-U133A 2.0 | HG-U133A                                       | HG-U133A                                   | HG-U133A   |
| Treatment Protocol   |               | Weekly paclitaxel x 12 or 3/weekly docetaxel x4 both followed by anthracycline x4. Endocrine therapy if ER+ |                   | 1/ 3 weeks AC x 4 followed by either 1/3 weeks ixabepilone x4 or weekly paclitaxel x 12 | 4 course FAC | 1/3 weeks FAC x 4 followed by weekly docetaxel | weekly paclitaxel x 12 followed by FAC x 4 |            |
